# Supplementary material for: Characterization of cognitive decline in long-duration type 1 diabetes by cognitive, neuroimaging, and pathological examinations
Source: JCI journal article supplement (doi:10.1172/jci.insight.180226), 2025-01-30

**Supplement to Shah et al. Characterization of cognitive decline in long-duration type 1 diabetes by cognitive, neuroimaging and pathological examinations**

**Supplementary Table 1: Baseline characteristics of the 50-year Medalist study**

| Baseline Characteristic                                           | Overall (N=1034) | Cognitive Subset (N=222) | BMRI Subset (N=52) | Longitudinal Subset (N=48) | Brain donors (N=26) |
|-------------------------------------------------------------------|------------------|--------------------------|--------------------|----------------------------|---------------------|
| Sex (female), N (%)                                               | 563 (54.5)       | 116 (52.3)               | 24 (46.2)          | 25 (52.1)                  | 7 (26.9)            |
| Age (years)                                                       | 66.07 (7.68)     | 63.8 (6.4)               | 61.94 (5.68)       | 63.0 (6.0)                 | 70.9 (6.8)          |
| Duration of disease (years)                                       | 53 [51-57]       | 52 [51-55]               | 52 [51-53.5]       | 52.5 (2.9)                 | 56.6 (5.5)          |
| Age at Diagnosis (years)                                          | 11.12 (6.38)     | 10.38 (5.87)             | 8.96 (4.81)        | 10.5 (5.5)                 | 14.3 (6.5)          |
| HbA1c (%)                                                         | 7.20 (0.96)      | 7.06 (0.80)              | 7.14 (0.70)        | 7.0 (0.6)                  | 7.48 (1.33)         |
| Body mass index (kg/m <sup>2</sup> )                              | 26.18 (4.69)     | 25.88 (4.38)             | 25.66 (3.37)       | 25.8 (3.4)                 | 25.2 (3.4)          |
| Diastolic blood pressure (mmHg)                                   | 64.22 (8.57)     | 65.18 (8.01)             | 64.43 (8.65)       | 63.9 (7.8)                 | 64.9 (9.6)          |
| Systolic blood pressure (mmHg)                                    | 132.40 (16.93)   | 132.20 (17.00)           | 129.3 (16.3)       | 130.5 (15.7)               | 132.2 (20.1)        |
| Hypertension, N (%)                                               | 765 (76.5)       | 150 (70.4)               | 31 (59.6)          | 26 (55.3)                  | 20 (76.9)           |
| Total cholesterol (mg/dL)                                         | 161.53 (33.31)   | 163.01 (32.22)           | 166.25 (29.90)     | 163.6 (26.7)               | 162.5 (38.6)        |
| High-density lipoprotein cholesterol (mg/dL)                      | 65.29 (19.83)    | 67.40 (19.33)            | 66.15 (18.67)      | 69.6 (16.9)                | 64.6 (21.9)         |
| Low-density lipoprotein cholesterol (mg/dL)                       | 81.08 (24.39)    | 80.91 (24.19)            | 86.61 (21.43)      | 80.9 (21.4)                | 81.8 (26.6)         |
| Triglycerides (mg/dL)                                             | 65.0 [50.0-89.0] | 64.0 [50.0-85.0]         | 58.0 [48.5-87.0]   | 61 [46.5-81.5]             | 59.5 [48.0-110.0]   |
| eGFR (ml/min/1.73m <sup>2</sup> )                                 | 69.7 (20.4)      | 75.6 (19.1)              | 81.9 (15.7)        | 76.9 (15.6)                | 65.4 (21.9)         |
| ACR (ug/mg)                                                       | 12.0 [6.6-32.7]  | 10.0 [5.1-20.0]          | 9.6 [6.8-16.6]     | 9.0 [5.1-13.0]             | 9.85 [7.2-37]       |
| Diabetic nephropathy (eGFR <45 ml/min/1.73m <sup>2</sup> ), N (%) | 131 (12.78)      | 17 (7.7)                 | 1 (1.9)            | 2 (4.2)                    | 4 (15.4)            |
| Proliferative diabetic retinopathy (ETDRS>53), N (%)              | 428 (46.47)      | 84 (41.4)                | 16 (35.6)          | 17 (37.0)                  | 9 (34.6)            |
| Cardiovascular disease, N (%)                                     | 398 (40.16)      | 66 (30.3)                | 10 (19.2)          | 19 (39.6)                  | 12 (46.2)           |
| Neuropathy (MNSI <sub>≥</sub> 2), N (%)                           | 656 (69.94)      | 128 (63.7)               | 27 (55.1)          | 27 (56.3)                  | 20 (76.9)           |
| Report ever smoking, N (%)                                        | 458 (47.46)      | 89 (41.6)                | 16 (31.4)          | 22 (45.8)                  | 13 (50.0)           |
| Report physical activity, N (%)                                   | 792 (78.26)      | 174 (80.9)               | 41 (78.9)          | 43 (89.6)                  | 20 (76.9)           |
| APOE (1 risk allele), N (%)                                       | 206 (26)         | 35 (20.0)                | 7 (16.7)           | 6 (15)                     | 5 (19.2)            |
| APOE (2 risk alleles), N (%)                                      | 9 (1.0)          | 1 (0.6)                  | 0 (0)              | 1 (2.5)                    | 1 (3.8)             |
| Education (some college or higher), N (%)                         | 925 (89.4)       | 204 (91.9)               | 44 (88.2)          | 33 (77.1)                  | 21 (80.7)           |

Data are mean (± SD), median (lower-upper quartile) or number (percentage). Abbreviations eGFR: estimated glomerular filtration rate; ACR: albumin-to-creatinine ratio; SD: standard deviation; BMRI=brain MRI

Supplementary Table 2: Associations between clinical factors and cognitive function in T1D - multivariable analysis

|                               | Unadjusted     |        | Multivariable   |                  |
|-------------------------------|----------------|--------|-----------------|------------------|
|                               | Est (SE)       | P      | Est (SE)        | P                |
| <b>Psychomotor (D)</b>        |                |        |                 |                  |
| Age                           | 4.62 (0.82)    | <.0001 | 1.69 (1.17)     | 0.1527           |
| Education                     | -61.95 (24.82) | 0.0134 | -51.12 (25.6)   | <b>0.0477</b>    |
| Duration                      | 4.94 (0.92)    | <.0001 | 3.75 (1.37)     | <b>0.007</b>     |
| eGFR                          | -0.69 (0.3)    | 0.0209 | 0 (0.34)        | 0.9893           |
| ACR                           | 8.03 (2.88)    | 0.0058 | -2.19 (3.55)    | 0.5388           |
| PDR                           | 37.95 (13.11)  | 0.0042 | 20.96 (13.46)   | 0.1216           |
| CRP                           | 6.15 (3.12)    | 0.0498 | -1.57 (3.33)    | 0.6379           |
| Visual acuity                 | 94.06 (13.42)  | <.0001 | 87.59 (16.73)   | <b>&lt;.0001</b> |
| IL-6                          | 34.09 (13.54)  | 0.0127 | 26.16 (11.72)   | <b>0.0272</b>    |
| <b>Psychomotor (ND)</b>       |                |        |                 |                  |
| Age                           | 6.31 (1.11)    | <.0001 | 1.88 (2.04)     | 0.3589           |
| Education                     | -79.41 (34.49) | 0.0223 | -113.95 (44.19) | <b>0.0113</b>    |
| Duration                      | 8.06 (1.21)    | <.0001 | 7.64 (2.55)     | <b>0.0035</b>    |
| SBP                           | 0.99 (0.47)    | 0.0363 | -1.32 (0.7)     | 0.0645           |
| eGFR                          | -0.79 (0.4)    | 0.0497 | 0.5 (0.54)      | 0.3529           |
| ACR                           | 12.19 (3.9)    | 0.002  | 4.81 (5.96)     | 0.4212           |
| PDR                           | 34.05 (17.88)  | 0.0584 | 24.77 (22.96)   | 0.2831           |
| CAC                           | 7.36 (3.57)    | 0.0413 | -0.43 (3.77)    | 0.9085           |
| Visual acuity                 | 111.58 (20.13) | <.0001 | 118.35 (28.83)  | <b>&lt;.0001</b> |
| IL-1 $\beta$                  | 19.62 (9.16)   | 0.0336 | 2.73 (9.11)     | 0.7652           |
| IL-6                          | 45.3 (18.31)   | 0.0143 | 32.22 (21.32)   | 0.1337           |
| <b>Immediate recall</b>       |                |        |                 |                  |
| Female                        | 8.77 (1.93)    | <.0001 | 8.6 (2.84)      | <b>0.0031</b>    |
| HDLC                          | 0.22 (0.06)    | <.0001 | 0.11 (0.12)     | 0.3697           |
| Total cholesterol             | 0.09 (0.03)    | 0.0022 | -0.04 (0.05)    | 0.353            |
| TG-HDL ratio                  | -3.21 (1.39)   | 0.0217 | -1.45 (2.36)    | 0.5406           |
| eIS                           | 6.87 (3.32)    | 0.0398 | 0.31 (5.01)     | 0.9506           |
| CVD                           | -6 (1.96)      | 0.0025 | 0.46 (2.73)     | 0.867            |
| CAC                           | -0.97 (0.42)   | 0.0217 | -0.51 (0.42)    | 0.2327           |
| <b>Delayed recall</b>         |                |        |                 |                  |
| Female                        | 8.18 (2.07)    | 0.0001 | 6.72 (2.2)      | <b>0.0026</b>    |
| CRP                           | 1.05 (0.53)    | 0.0476 | 0.64 (0.59)     | 0.2789           |
| IL-1 $\beta$                  | -2.27 (1.05)   | 0.0325 | -2.45 (1.05)    | <b>0.0208</b>    |
| IFN- $\gamma$                 | 2.27 (1.07)    | 0.0345 | 2.12 (1.05)     | <b>0.0449</b>    |
| <b>Executive function</b>     |                |        |                 |                  |
| Age                           | -0.07 (0.03)   | 0.0134 | -0.02 (0.05)    | 0.6728           |
| Duration                      | -0.08 (0.03)   | 0.0105 | -0.08 (0.06)    | 0.184            |
| LDLc                          | -0.02 (0.01)   | 0.0138 | 0.02 (0.02)     | 0.4961           |
| Total cholesterol             | -0.01 (0.01)   | 0.0165 | -0.04 (0.02)    | <b>0.0318</b>    |
| Triglyceride                  | -0.92 (0.42)   | 0.0302 | -1.04 (0.54)    | 0.0585           |
| ACR                           | -0.21 (0.09)   | 0.0253 | 0 (0.12)        | 0.9812           |
| CAC                           | -0.19 (0.09)   | 0.036  | -0.08 (0.09)    | 0.373            |
| Visual acuity                 | -1.4 (0.55)    | 0.0118 | -0.95 (0.71)    | 0.1851           |
| IL-1 $\beta$                  | -0.43 (0.21)   | 0.0427 | -0.5 (0.23)     | <b>0.0306</b>    |
| <b>Working memory</b>         |                |        |                 |                  |
| Education                     | 0.37 (0.18)    | 0.0431 | 0.29 (0.18)     | 0.1126           |
| Triglyceride                  | -1.5 (0.38)    | 0.0001 | -1.17 (0.69)    | 0.0895           |
| TG-HDL ratio                  | -0.86 (0.29)   | 0.0032 | -0.41 (0.74)    | 0.5815           |
| eIS                           | 1.26 (0.62)    | 0.0427 | 0.01 (0.78)     | 0.9872           |
| VAI                           | -0.01 (0)      | 0.0336 | 0 (0.01)        | 0.732            |
| CVD                           | -0.78 (0.38)   | 0.0408 | -0.41 (0.39)    | 0.2959           |
| <b>Global cognition mis</b>   |                |        |                 |                  |
| Age at diagnosis              | -0.13 (0.06)   | 0.0438 | -0.09 (0.06)    | 0.0984           |
| Female                        | 1.71 (0.66)    | 0.0108 | 2.05 (0.61)     | <b>0.0011</b>    |
| SBP                           | -0.06 (0.02)   | 0.0096 | -0.07 (0.02)    | <b>0.0008</b>    |
| eGFR                          | -0.04 (0.02)   | 0.0215 | -0.04 (0.02)    | <b>0.0452</b>    |
| CML                           | 1.16 (0.45)    | 0.012  | 0.8 (0.51)      | 0.1226           |
| <b>Global cognition total</b> |                |        |                 |                  |
| Age                           | -0.08 (0.04)   | 0.03   | -0.05 (0.04)    | 0.2197           |
| SBP                           | -0.03 (0.02)   | 0.0295 | -0.01 (0.02)    | 0.6031           |
| Visual acuity                 | -1.45 (0.6)    | 0.0173 | -1.34 (0.63)    | <b>0.0376</b>    |
| CAC                           | -0.18 (0.09)   | 0.0444 | -0.11 (0.09)    | 0.224            |

Est (SE): Estimate (standard error) from linear regression models testing cognitive parameters as dependent variables and clinical parameters as independent.

Unadjusted analysis examines bivariate relationships between each clinical variable and cognitive parameter, multivariable analysis examines all variables in same model. D, ND: Dominant and non-dominant hands; mis: Memory index score; eGFR: estimated glomerular filtration rate;

ACR: Urine albumin creatinine ratio; PDR: proliferative diabetic retinopathy; CVD: cardiovascular disease; CRP: C-reactive protein; SBP: systolic blood pressure

CAC: coronary artery calcification; TG: Triglyceride; eIS: estimated insulin sensitivity; VAI: visceral adiposity index; CML: carboxymethyl-lysine

**Supplementary Table 3: Associations between physical or lifestyle activities and cognitive function**

| Activity                                               | Cognitive Function                    | Estimate | SE    | <i>p</i>     |
|--------------------------------------------------------|---------------------------------------|----------|-------|--------------|
| <b>Physical activity (Paffenbarger, N=150)</b>         |                                       |          |       |              |
| ↑ Stairs climbed/day                                   | ↑ Executive function                  | 0.074    | 0.03  | 0.014        |
| ↑ Blocks walked/day                                    | ↑ psychomotor speed & efficiency (ND) | 0.857    | 0.378 | 0.025        |
| ↑ Kcal/week for swimming                               | ↑ Delayed recall                      | 0.011    | 0.005 | 0.043        |
| ↑ Duration/week for swimming                           | ↑ Delayed recall                      | 5.936    | 2.84  | 0.038        |
| <b>Lifestyle activity, frequency/month (LAQ, N=62)</b> |                                       |          |       |              |
| ↑ driving or using public transportation               | ↑ executive function                  | 0.08     | 0.03  | <b>0.031</b> |
| ↑ going to movies                                      | ↓ executive function                  | -0.96    | 0.45  | <b>0.039</b> |
| ↑ sewing                                               | ↓ psychomotor speed & efficiency (D)  | -3.55    | 1.11  | <b>0.003</b> |
| ↑ sewing                                               | ↓ psychomotor speed & efficiency (ND) | -5.09    | 1.6   | <b>0.003</b> |
| ↑ talking about local/national issues                  | ↓ psychomotor speed & efficiency (ND) | -2.62    | 1.27  | <b>0.044</b> |

Models adjusted for age, sex, and education. SE= Standard error.

**Supplementary Table 4. Associations of dietary patterns with cognitive function (N=160)**

| Cognitive function        | aMed         |              | DASH         |              | MIND         |       | EDIH         |              | EDIP         |              |
|---------------------------|--------------|--------------|--------------|--------------|--------------|-------|--------------|--------------|--------------|--------------|
|                           | Est (SE)     | P            | Est (SE)     | P            | Est (SE)     | P     | Est (SE)     | P            | Est (SE)     | P            |
| Psychomotor function (D)  | -2.96 (4.53) | 0.514        | 0.36 (2.12)  | 0.864        | -4.44 (3.39) | 0.192 | -6.08 (11)   | 0.581        | 6.25 (7.67)  | 0.416        |
| Psychomotor function (ND) | -4.33 (5.68) | 0.447        | -0.27 (2.73) | 0.920        | -4.71 (4.82) | 0.330 | -6.08 (11)   | 0.581        | 3.78 (9.6)   | 0.694        |
| Working memory            | 0.27 (0.11)  | <b>0.019</b> | 0.17 (0.05)  | <b>0.002</b> | 0.22 (0.12)  | 0.063 | 0.61 (0.22)  | <b>0.007</b> | 0.19 (0.2)   | 0.327        |
| Delayed recall            | -0.92 (0.74) | 0.218        | -0.56 (0.34) | 0.105        | 0.67 (0.64)  | 0.299 | -0.74 (1.45) | 0.609        | -0.22 (1.26) | 0.865        |
| Immediate recall          | -0.69 (0.64) | 0.281        | -0.23 (0.31) | 0.447        | 0.68 (0.6)   | 0.260 | 0 (1.25)     | 1.000        | 0.06 (1.09)  | 0.955        |
| Executive function        | 0.06 (0.14)  | 0.651        | 0.04 (0.06)  | 0.496        | -0.02 (0.13) | 0.902 | -0.44 (0.27) | 0.100        | -0.67 (0.23) | <b>0.003</b> |
| Global cognition (total)  | 0.16 (0.18)  | 0.368        | 0.04 (0.08)  | 0.644        | 0.07 (0.17)  | 0.684 | -0.12 (0.36) | 0.745        | 0.02 (0.29)  | 0.938        |
| Global cognition (mis)    | 0.16 (0.26)  | 0.532        | 0 (0.11)     | 0.965        | 0.03 (0.27)  | 0.906 | -0.77 (0.5)  | 0.130        | 0.08 (0.41)  | 0.853        |

aMed: alternate Mediterranean; DASH: Dietary Approaches to Stop Hypertension; MIND: Mediterranean-DASH Intervention for Neurodegenerative Delay; EDIH: Empirical Index for Hyperinsulinemia; EDIP: Empirical Dietary Inflammatory Pattern; D: dominant hand; ND: non-dominant hand; mis: Memory index score. Higher scores for all dietary indices represent higher adherence to (aMed, DASH, MIND) or higher intake (EDIH, EDIP) of healthier diets. Estimates (Est), standard errors (SE) and p-values obtained from generalized linear regression models testing associations of dietary pattern to cognitive function.

Supplementary Table 5: Associations between brain volumes and cognitive function in T1D (n=52)

| Cognitive parameter       | Total brain  |                 | Total white matter |                 | Total gray matter |                 | Frontal lobe |                 | Parietal lobe |                 | Occipital lobe |                 | Temporal lobe |                 | Hippocampal    |                 | Alzheimer's disease signature region |                 | Deep gray matter |                 |  |
|---------------------------|--------------|-----------------|--------------------|-----------------|-------------------|-----------------|--------------|-----------------|---------------|-----------------|----------------|-----------------|---------------|-----------------|----------------|-----------------|--------------------------------------|-----------------|------------------|-----------------|--|
|                           | Est (SE)     | P               | Est (SE)           | P               | Est (SE)          | P               | Est (SE)     | P               | Est (SE)      | P               | Est (SE)       | P               | Est (SE)      | P               | Est (SE)       | P               | Est (SE)                             | P               | Est (SE)         | P               |  |
| <b>Immediate recall</b>   |              |                 |                    |                 |                   |                 |              |                 |               |                 |                |                 |               |                 |                |                 |                                      |                 |                  |                 |  |
| Model 1                   | -0.04 (0.03) | 0.193           | -0.07 (0.05)       | 0.168           | -0.05 (0.05)      | 0.339           | -0.17 (0.18) | 0.352           | -0.06 (0.26)  | 0.811           | -0.89 (0.41)   | <b>0.035</b>    | -0.15 (0.26)  | 0.57            | -0.67 (3.01)   | 0.826           | -0.14 (0.44)                         | 0.75            | -0.29 (0.87)     | 0.744           |  |
| Model 2                   | -0.02 (0.04) | 0.709           | -0.04 (0.06)       | 0.546           | 0.01 (0.08)       | 0.917           | -0.13 (0.23) | 0.586           | 0.13 (0.28)   | 0.637           | -0.73 (0.59)   | 0.220           | 0.35 (0.4)    | 0.382           | 5.45 (3.83)    | 0.161           | 0.48 (0.53)                          | 0.373           | 0.4 (0.97)       | 0.678           |  |
| <b>Delayed recall</b>     |              |                 |                    |                 |                   |                 |              |                 |               |                 |                |                 |               |                 |                |                 |                                      |                 |                  |                 |  |
| Model 1                   | -0.01 (0.03) | 0.686           | -0.04 (0.05)       | 0.447           | 0 (0.05)          | 0.946           | 0.03 (0.18)  | 0.853           | 0 (0.25)      | 0.986           | -0.6 (0.39)    | 0.134           | 0.07 (0.25)   | 0.767           | 1.3 (2.83)     | 0.647           | 0.1 (0.41)                           | 0.812           | -0.06 (0.82)     | 0.939           |  |
| Model 2                   | -0.01 (0.04) | 0.753           | -0.04 (0.06)       | 0.471           | 0.03 (0.08)       | 0.714           | 0.01 (0.23)  | 0.980           | 0.06 (0.27)   | 0.829           | -0.95 (0.57)   | 0.105           | 0.32 (0.39)   | 0.414           | 4.78 (3.79)    | 0.214           | 0.34 (0.53)                          | 0.528           | 0.03 (0.96)      | 0.976           |  |
| <b>Psychomotor (D)</b>    |              |                 |                    |                 |                   |                 |              |                 |               |                 |                |                 |               |                 |                |                 |                                      |                 |                  |                 |  |
| Model 1                   | -0.43 (0.07) | <b>3.00E-07</b> | -0.64 (0.14)       | <b>2.00E-05</b> | -0.83 (0.14)      | <b>6.00E-07</b> | -2.27 (0.57) | <b>2.00E-04</b> | -3.13 (0.75)  | <b>1.00E-04</b> | -4.93 (1.28)   | <b>4.00E-04</b> | -3.87 (0.69)  | <b>1.00E-06</b> | -44.2 (8.0)    | <b>1.00E-06</b> | -5.9 (1.2)                           | <b>1.00E-05</b> | -10.3 (2.5)      | <b>1.00E-04</b> |  |
| Model 2                   | -0.32 (0.12) | <b>0.009</b>    | -0.35 (0.17)       | <b>0.050</b>    | -0.6 (0.24)       | <b>0.016</b>    | -1.03 (0.73) | 0.164           | -1.92 (0.76)  | <b>0.015</b>    | -1.5 (1.79)    | 0.407           | -2.61 (1.18)  | <b>0.031</b>    | -30.25 (10.85) | <b>0.008</b>    | -3.29 (1.54)                         | <b>0.038</b>    | -5.29 (2.68)     | <b>0.055</b>    |  |
| <b>Psychomotor (ND)</b>   |              |                 |                    |                 |                   |                 |              |                 |               |                 |                |                 |               |                 |                |                 |                                      |                 |                  |                 |  |
| Model 1                   | -0.78 (0.19) | <b>1.00E-04</b> | -1.2 (0.33)        | <b>7.00E-04</b> | -1.48 (0.37)      | <b>3.00E-04</b> | -3.5 (1.45)  | <b>0.02</b>     | -5.31 (1.86)  | <b>0.007</b>    | -5.8 (3.3)     | 0.086           | -7.78 (1.73)  | <b>5.00E-05</b> | -97.1 (19.4)   | <b>9.00E-06</b> | -11.3 (3.0)                          | <b>6.00E-04</b> | -19.4 (6.1)      | <b>0.003</b>    |  |
| Model 2                   | -0.81 (0.3)  | <b>0.011</b>    | -0.88 (0.45)       | <b>0.058</b>    | -1.48 (0.6)       | <b>0.018</b>    | -1.94 (1.86) | 0.305           | -3.93 (1.97)  | <b>0.052</b>    | 0.2 (4.6)      | 0.965           | -8.98 (2.85)  | <b>0.003</b>    | -91.89 (26.86) | <b>0.001</b>    | -8.79 (3.97)                         | <b>0.033</b>    | -11.96 (6.86)    | 0.089           |  |
| <b>Working memory</b>     |              |                 |                    |                 |                   |                 |              |                 |               |                 |                |                 |               |                 |                |                 |                                      |                 |                  |                 |  |
| Model 1                   | 0 (0)        | 0.787           | 0 (0.01)           | 0.74            | 0 (0.01)          | 0.882           | 0 (0.03)     | 0.893           | 0 (0.04)      | 0.909           | 0.05 (0.06)    | 0.418           | 0.01 (0.04)   | 0.87            | -0.32 (0.43)   | 0.471           | 0.03 (0.06)                          | 0.647           | -0.08 (0.13)     | 0.554           |  |
| Model 2                   | 0 (0.01)     | 0.818           | 0 (0.01)           | 0.862           | -0.01 (0.01)      | 0.510           | -0.04 (0.03) | 0.205           | -0.03 (0.04)  | 0.496           | 0.07 (0.08)    | 0.414           | -0.03 (0.06)  | 0.635           | -0.34 (0.56)   | 0.545           | 0.01 (0.08)                          | 0.925           | -0.09 (0.14)     | 0.536           |  |
| <b>Executive function</b> |              |                 |                    |                 |                   |                 |              |                 |               |                 |                |                 |               |                 |                |                 |                                      |                 |                  |                 |  |
| Model 1                   | 0.01 (0.01)  | <b>0.018</b>    | 0.03 (0.01)        | <b>0.004</b>    | 0.02 (0.01)       | 0.176           | 0.03 (0.04)  | 0.381           | 0.03 (0.05)   | 0.578           | 0.14 (0.09)    | 0.114           | 0.09 (0.05)   | 0.11            | 1.32 (0.61)    | <b>0.036</b>    | 0.13 (0.09)                          | 0.147           | 0.05 (0.17)      | 0.762           |  |
| Model 2                   | 0.02 (0.01)  | <b>0.027</b>    | 0.03 (0.01)        | <b>0.007</b>    | 0.01 (0.02)       | 0.496           | 0.02 (0.05)  | 0.717           | -0.01 (0.06)  | 0.805           | 0.13 (0.12)    | 0.322           | 0.1 (0.08)    | 0.265           | 1.68 (0.8)     | <b>0.043</b>    | 0.09 (0.11)                          | 0.441           | -0.03 (0.19)     | 0.889           |  |
| <b>Global (MIS)</b>       |              |                 |                    |                 |                   |                 |              |                 |               |                 |                |                 |               |                 |                |                 |                                      |                 |                  |                 |  |
| Model 1                   | 0 (0)        | 0.506           | 0 (0.01)           | 0.691           | -0.01 (0.01)      | 0.405           | -0.03 (0.03) | 0.362           | -0.06 (0.04)  | 0.146           | -0.11 (0.07)   | 0.122           | -0.03 (0.04)  | 0.469           | -0.3 (0.5)     | 0.554           | -0.11 (0.07)                         | 0.136           | -0.13 (0.14)     | 0.381           |  |
| Model 2                   | 0 (0.01)     | 0.575           | 0.01 (0.01)        | 0.545           | 0 (0.01)          | 0.811           | -0.01 (0.04) | 0.873           | -0.05 (0.05)  | 0.321           | -0.07 (0.1)    | 0.507           | 0.03 (0.07)   | 0.647           | 0.28 (0.68)    | 0.681           | -0.08 (0.1)                          | 0.416           | -0.05 (0.18)     | 0.788           |  |
| <b>Global (Total)</b>     |              |                 |                    |                 |                   |                 |              |                 |               |                 |                |                 |               |                 |                |                 |                                      |                 |                  |                 |  |
| Model 1                   | 0.01 (0)     | 0.096           | 0.01 (0.01)        | 0.124           | 0.01 (0.01)       | 0.125           | 0.02 (0.02)  | 0.38            | 0.02 (0.03)   | 0.414           | 0.03 (0.05)    | 0.539           | 0.06 (0.03)   | 0.059           | 0.62 (0.34)    | 0.074           | 0.07 (0.05)                          | 0.146           | 0.01 (0.1)       | 0.908           |  |
| Model 2                   | 0.01 (0.01)  | 0.242           | 0.01 (0.01)        | 0.303           | 0.01 (0.01)       | 0.367           | 0.01 (0.03)  | 0.843           | 0 (0.03)      | 0.926           | -0.02 (0.07)   | 0.788           | 0.08 (0.05)   | 0.108           | 0.78 (0.46)    | 0.100           | 0.05 (0.07)                          | 0.452           | -0.07 (0.11)     | 0.561           |  |

Model 1: Adjusted by Intracranial vol. (ICV) ; Model 2: adjustment by age, sex, education and ICV  
 Est: Estimate SE: Standard error ; D: dominant hand; ND: non-dominant hand; MIS: Memory index score.

Supplementary Table 6: Associations between clinical factors and brain volumes in T1D - multivariable analysis

|                                    | Unadjusted       |          | Multivariable  |              |
|------------------------------------|------------------|----------|----------------|--------------|
|                                    | Est (SE)         | P        | Est (SE)       | P            |
| <b>Total brain</b>                 |                  |          |                |              |
| Age                                | -6.282 (1.93)    | 0.002    | -1.34 (1.77)   | 0.453        |
| Education                          | 45.542 (9.91)    | 3.20E-05 | 17.27 (27.98)  | 0.541        |
| Duration                           | -6.542 (2.11)    | 0.003    | -4.08 (1.84)   | <b>0.033</b> |
| Female                             | -119.088 (21.73) | 1.50E-06 | -65.22 (20.45) | <b>0.003</b> |
| Waist-hip ratio                    | 336.597 (121.75) | 0.008    | 66.38 (86.53)  | 0.448        |
| Exercise                           | 70.009 (29.31)   | 0.021    | 14.32 (20.26)  | 0.484        |
| Total cholesterol                  | -0.713 (0.31)    | 0.027    | -0.19 (0.26)   | 0.459        |
| HDLc                               | -2.008 (0.66)    | 0.004    | -1.03 (0.57)   | 0.077        |
| Visual acuity                      | -82.50 (29.46)   | 0.0073   | -67.34 (21.16) | <b>0.003</b> |
| IL-1 $\beta$                       | -57.57 (18.13)   | 0.0026   | -32.06 (11.88) | <b>0.010</b> |
| <b>Total white matter</b>          |                  |          |                |              |
| Age                                | -3.308 (1.14)    | 0.006    | -0.37 (1.21)   | 0.764        |
| Education                          | 21.705 (6.21)    | 0.001    | 4.67 (19.46)   | 0.812        |
| Duration                           | -3.493 (1.24)    | 0.007    | -2.63 (1.29)   | <b>0.049</b> |
| Female                             | -57.714 (13.73)  | 1.11E-04 | -30.52 (13.44) | <b>0.029</b> |
| Exercise                           | 37.137 (17.17)   | 0.035    | 9.85 (14.19)   | 0.492        |
| Total cholesterol                  | -0.46 (0.18)     | 0.013    | -0.29 (0.18)   | 0.104        |
| HDLc                               | -1.005 (0.39)    | 0.014    | -0.38 (0.4)    | 0.345        |
| Visual acuity                      | -44.42 (17.14)   | 0.013    | -38.9 (14.8)   | <b>0.012</b> |
| IL-1 $\beta$                       | -29.79 (10.74)   | 0.0079   | -18.36 (8.25)  | <b>0.032</b> |
| <b>Total gray matter</b>           |                  |          |                |              |
| Age                                | -2.974 (1.03)    | 0.006    | -0.61 (1.01)   | 0.552        |
| Education                          | 23.837 (5.15)    | 2.83E-05 | 13.42 (15.78)  | 0.401        |
| Duration                           | -3.049 (1.12)    | 0.009    | -1.4 (1.04)    | 0.188        |
| Female                             | -61.374 (11.47)  | 2.29E-06 | -33.83 (11.21) | <b>0.005</b> |
| Waist-hip ratio                    | 196.36 (62.47)   | 0.003    | 52.09 (48.13)  | 0.287        |
| Exercise                           | 32.872 (15.5)    | 0.039    | 2.72 (11.37)   | 0.812        |
| ACR                                | -5.53 (2.73)     | 0.049    | -2.68 (1.95)   | 0.179        |
| HDLc                               | -1.003 (0.35)    | 0.006    | -0.52 (0.27)   | 0.068        |
| Visual acuity                      | -38.08 (15.10)   | 0.015    | -26.75 (11.86) | <b>0.031</b> |
| IL-1 $\beta$                       | -27.78 (9.63)    | 0.006    | -13.41 (6.72)  | <b>0.054</b> |
| <b>Frontal lobe</b>                |                  |          |                |              |
| Education                          | 6.156 (1.54)     | 2.00E-04 | 10.54 (4.98)   | <b>0.041</b> |
| Female                             | -14.228 (3.69)   | 3.00E-04 | -8.49 (4.05)   | <b>0.043</b> |
| HDL                                | -0.246 (0.1)     | 0.023    | -0.13 (0.09)   | 0.168        |
| PDR                                | -7.949 (3.65)    | 0.035    | -4.52 (3.11)   | 0.155        |
| IL-1 $\beta$                       | -6.701 (2.89)    | 0.025    | -2.31 (2.43)   | 0.349        |
| <b>Parietal lobe</b>               |                  |          |                |              |
| Age                                | -0.493 (0.22)    | 0.031    | 0.11 (0.28)    | 0.698        |
| Education                          | 2.768 (1.23)     | 0.029    | 3.19 (4.14)    | 0.446        |
| Duration                           | -0.681 (0.23)    | 0.005    | -0.38 (0.29)   | 0.187        |
| Female                             | -6.003 (2.89)    | 0.043    | -2.8 (2.92)    | 0.345        |
| Waist-hip ratio                    | 43.788 (12.87)   | 0.001    | 22.55 (14.55)  | 0.129        |
| ACR                                | 1.39 (0.57)      | 0.018    | -1.19 (0.58)   | <b>0.045</b> |
| TNF- $\alpha$                      | -6.18 (2.83)     | 0.03     | -2.97 (2.73)   | 0.282        |
| <b>Occipital lobe</b>              |                  |          |                |              |
| Female                             | -7.86 (1.45)     | 1.80E-06 | -5.2 (1.47)    | <b>0.001</b> |
| Age                                | -0.364 (0.13)    | 0.008    | -0.28 (0.1)    | <b>0.007</b> |
| Education                          | 2.368 (0.71)     | 0.002    | 2.22 (2.14)    | 0.306        |
| Total cholesterol                  | -0.06 (0.02)     | 0.01     | -0.02 (0.02)   | 0.230        |
| HDLc                               | -0.133 (0.04)    | 0.004    | -0.03 (0.04)   | 0.532        |
| Visual acuity                      | -4.06 (1.97)     | 0.045    | -2.18 (1.56)   | 0.169        |
| IL-1 $\beta$                       | -2.89 (1.26)     | 0.026    | -1.12 (0.89)   | 0.216        |
| <b>Temporal lobe</b>               |                  |          |                |              |
| Age                                | -0.635 (0.21)    | 0.004    | -0.22 (0.21)   | 0.302        |
| Education                          | 4.949 (1.07)     | 2.70E-05 | 4.16 (3.29)    | 0.214        |
| Duration                           | -0.651 (0.23)    | 0.007    | -0.32 (0.22)   | 0.147        |
| Female                             | -13.105 (2.32)   | 7.80E-07 | -8.31 (2.35)   | <b>0.001</b> |
| Waist-hip ratio                    | 38.407 (13.01)   | 0.005    | 6.2 (10.01)    | 0.540        |
| Exercise                           | 6.966 (3.19)     | 0.034    | 1.16 (2.39)    | 0.628        |
| HDLc                               | -0.198 (0.07)    | 0.009    | -0.09 (0.06)   | 0.124        |
| Visual acuity                      | -7.65 (3.17)     | 0.02     | -4.94 (2.49)   | <b>0.055</b> |
| IL-1 $\beta$                       | -5.37 (2.0)      | 0.01     | -2.26 (1.4)    | 0.115        |
| <b>Hippocampal</b>                 |                  |          |                |              |
| Age                                | -0.06 (0.02)     | 0.003    | -0.01 (0.02)   | 0.736        |
| Education                          | 0.33 (0.1)       | 0.002    | 0.14 (0.31)    | 0.648        |
| Duration                           | -0.06 (0.02)     | 0.003    | -0.03 (0.02)   | 0.130        |
| Female                             | -1.07 (0.21)     | 6.30E-06 | -0.77 (0.23)   | <b>0.002</b> |
| Waist-hip ratio                    | 3.215 (1.15)     | 0.007    | 0.91 (1.01)    | 0.373        |
| ACR                                | -0.11 (0.05)     | 0.027    | -0.08 (0.04)   | 0.059        |
| HDLc                               | -0.02 (0.01)     | 0.02     | -0.01 (0.01)   | 0.321        |
| IL-1 $\beta$                       | -0.46 (0.17)     | 0.01     | -0.29 (0.14)   | <b>0.041</b> |
| <b>Alzheimer's ds sig region</b>   |                  |          |                |              |
| Age                                | -0.348 (0.13)    | 0.01     | 0.14 (0.13)    | 0.285        |
| Education                          | 2.389 (0.69)     | 0.001    | -0.66 (2.03)   | 0.748        |
| Duration                           | -0.435 (0.14)    | 0.003    | -0.36 (0.14)   | <b>0.012</b> |
| Female                             | -6.293 (1.56)    | 2.00E-04 | -3.16 (1.43)   | <b>0.034</b> |
| Waist-hip ratio                    | 25.703 (7.73)    | 0.002    | 6.69 (6.56)    | 0.315        |
| BMI                                | 0.334 (0.15)     | 0.029    | 0.12 (0.12)    | 0.294        |
| Exercise                           | 4.313 (1.93)     | 0.03     | 0.65 (1.5)     | 0.668        |
| HDLc                               | -0.104 (0.04)    | 0.024    | -0.08 (0.04)   | <b>0.028</b> |
| ACR                                | -0.79 (0.34)     | 0.027    | -0.43 (0.25)   | 0.102        |
| Visual acuity                      | -4.76 (1.91)     | 0.017    | -4.81 (1.51)   | <b>0.003</b> |
| IL-1 $\beta$                       | -3.09 (1.22)     | 0.015    | -1.97 (0.91)   | <b>0.037</b> |
| TNF- $\alpha$                      | -3.53 (1.70)     | 0.042    | -2.96 (1.23)   | <b>0.022</b> |
| <b>Deep gray matter</b>            |                  |          |                |              |
| Age                                | -0.153 (0.07)    | 0.025    | -0.04 (0.09)   | 0.681        |
| Education                          | 1.07 (0.36)      | 0.005    | -0.3 (1.19)    | 0.805        |
| Duration                           | -0.181 (0.07)    | 0.014    | -0.12 (0.1)    | 0.214        |
| Female                             | -2.737 (0.81)    | 0.001    | -2.4 (0.9)     | <b>0.012</b> |
| Waist-hip ratio                    | 13.04 (3.85)     | 0.001    | 6.17 (4.59)    | 0.188        |
| Lifetime hypoglycemia severity eIS | -0.087 (0.04)    | 0.026    | -0.08 (0.03)   | <b>0.019</b> |
|                                    | -2.665 (1.31)    | 0.047    | -1.47 (1.35)   | 0.285        |

Est (SE): Estimate (standard error) from linear regression models testing cognitive parameters as dependent variables and clinical parameters as independent.

Unadjusted analysis examines bivariate relationships between each clinical variable and cognitive parameter, multivariable analysis examines all variables in same model. ACR: Albumin-creatinine ratio

Supplementary Table 7: Clinical history and brain pathology in 26 brain donors

| NO | Sex | Age | APOE | Clinical hx |          |        |      |           |             | Complications |     |     |     | Brain histopathology |                |                  |                  |      | Brain wt (g) |                     |             |         |
|----|-----|-----|------|-------------|----------|--------|------|-----------|-------------|---------------|-----|-----|-----|----------------------|----------------|------------------|------------------|------|--------------|---------------------|-------------|---------|
|    |     |     |      | smoke       | exercise | COD    | Time | HbA1c (%) | HDL (mg/dL) | CVD           | DN  | DPN | PDR | Vascular             |                |                  |                  |      |              | Alzheimer's related |             | Atrophy |
|    |     |     |      |             |          |        |      |           |             |               |     |     |     | Hemo-Infarct         | Arterio-rrhage | Athero-sclerosis | Athero-sclerosis | CAA  |              | Amyloid plaques     | Braak Stage |         |
| 1  | M   | 75  | e3e3 | Y           | Y        | U      | 1y   | 10.5      | 51          | yes           | no  | .   | .   | yes                  | no             | mild-mod         | mod              | no   | +++          | III-IV              | mild-mod    | 1080    |
| 2  | M   | 80  | e3e4 | Y           | Y        | MOD    | 6y   | 7.4       | 62          | yes           | no  | .   | Yes | no                   | no             | mild-mod         | mild             | no   | +            | II                  | no          | 1270    |
| 3  | F   | 77  | e3e3 | N           | N        | CVD    | 5y   | 6.2       | 51          | yes           | yes | .   | .   | no                   | no             | mild-mod         | no               | no   | negative     | II                  | mild        | 1240    |
| 4  | F   | 90  | e3e4 | N           | Y        | Ren.F  | 9y   | 7.5       | 100         | yes           | yes | Yes | Yes | no                   | no             | mod              | mod              | mild | ++           | II                  | mild        | 1005    |
| 5  | F   | 82  | e3e3 | N           | Y        | CVD    | 8y   | 7.4       | 99          | yes           | no  | Yes | no  | no                   | no             | no               | mild             | no   | negative     | NA                  | yes         | 900     |
| 6  | M   | 80  | e3e3 | Y           | N        | Diab.  | 7y   | 7.8       | 43          | yes           | Yes | Yes | no  | no                   | no             | mild-mod         | mild             | no   | negative     | II;                 | mild        | 1110    |
| 7  | M   | 80  | e3e3 | Y           | Y        | U      | 5y   | 6.8       | 66          | no            | No  | yes | yes | yes                  | yes            | mod              | mod              | no   | negative     | I                   | no          | 1180    |
| 8  | M   | 83  | e4e4 | Y           | N        | Resp.F | 7y   | 7.5       | 76          | yes           | No  | .   | yes | no                   | no             | mod              | mild             | mod  | +++          | IV                  | mild        | 1140    |
| 9  | M   | 81  | e3e3 | N           | Y        | U      | 7y   | 7.1       | 58          | .             | No  | .   | no  | no                   | no             | mild             | no               | no   | ++           | III                 | no          | 1160    |
| 10 | M   | 92  | e3e3 | Y           | N        | CVD    | 14y  | 6.4       | 38          | no            | No  | no  | no  | no                   | no             | mod-sev          | no               | no   | NA           | III                 | mild        | 1170    |
| 11 | M   | 67  | e3e3 | Y           | Y        | Resp.F | 15y  | 8         | 43          | yes           | No  | yes | yes | yes                  | mvl            | mild-            | no               | no   | NA           | III                 | no          | 1250    |
| 12 | M   | 89  | e3e4 | Y           | Y        | AlzD.  | 14y  | 7.5       | 80          | no            | Yes | no  | no  | yes                  | no             | mod              | mild             | mod  | ++           | I-II                | mild        | 1100    |
| 13 | M   | 81  | e2e3 | N           | Y        | CVD    | 2y   | 5.1       | 51          | yes           | Yes | yes | .   | yes                  | mvl            | mod-sev          | mild             | no   | NA           | I                   | mild        | 1180    |
| 14 | M   | 92  | e2e3 | Y           | Y        | CVD    | 2y   | 6.2       | 70          | yes           | No  | .   | yes | no                   | no             | mod              | mod              | mild | +            | III                 | mild        | 1080    |
| 15 | M   | 86  | e3e3 | Y           | N        | Ren.F  | 0.6y | 7         | 65          | no            | Yes | Yes | .   | no                   | no             | mod              | mild             | no   | negative     | I                   | no          | 1330    |
| 16 | M   | 91  | e2e3 | N           | Y        | CVD    | 10y  | 7.2       | 52          | no            | No  | .   | no  | no                   | yes            | mild             | mild             | mod  | negative     | I                   | no          | 1320    |
| 17 | M   | 80  | e3e3 | Y           | Y        | CVD    | 13y  | 6.8       | 55          | yes           | no  | Yes | no  | yes                  | no             | mod              | mild             | mild | +++          | IV-V                | mild        | 1250    |
| 18 | M   | 70  | e3e4 | N           | Y        | CVD    | 9y   | 7.6       | 48          | yes           | no  | .   | no  | no                   | no             | mod              | mild             | mod  | +            | I                   | mild        | 1200    |
| 19 | M   | 84  | e3e3 | N           | Y        | Acci   | 6y   | 6.7       | 36          | no            | No  | .   | yes | no                   | no             | mod              | mild             | no   | ++           | III-IV              | mild        | 1150    |
| 20 | F   | 92  | e3e3 | N           | Y        | Cancer | 12y  | 8.2       | 58          | no            | No  | Yes | no  | no                   | mvl            | mild-mod         | mild             | no   | +            | III                 | mild        | 980     |
| 21 | F   | 69  | e3e3 | N           | N        | CVD    | 13y  | 8.7       | 48          | no            | No  | Yes | .   | no                   | no             | mod              | mild             | no   | negative     | 0                   | mild        | 1200    |
| 22 | F   | 85  | e3e3 | N           | Y        | AlzD   | 16y  | 8.5       | 89          | yes           | No  | Yes | .   | no                   | no             | mod              | mild             | mod  | +++          | V                   | mild        | 1010    |
| 23 | M   | 71  | -    | Y           | Y        | Acc.   | 7y   | 7.2       | 90          | yes           | No  | .   | yes | no                   | no             | mod              | no               | mod  | ++           | III                 | no          | 1490    |
| 24 | M   | 91  | e2e3 | -           | Y        | ESKD   | 16y  | 6.1       | 73          | yes           | Yes | .   | Yes | No                   | mvl            | mild-mod         | No               | mod  | ++           | III                 | mild        | 1050    |
| 25 | F   | 76  | e3e3 | Y           | Y        | CVD    | 11y  | 7.9       | 54          | yes           | No  | Yes | no  | no                   | no             | mod              | no               | mod  | negative     | II                  | Mild        | 1260    |
| 26 | M   | 80  | e3e4 | N           | Y        | CVD    | 5y   | 6.5       | 34          | yes           | No  | .   | no  | no                   | no             | mod              | mod              | mod  | negative     | I                   | mild        | 1390    |

COD: Cause of death; U: Unknown/Other; MOD: Multi-organ dysfunction; CVD: cardiovascular disease; Resp.F: Respiratory failure; AlzD: Alzheimer's disease; Ren.F: Renal failure; Acci: Accident; ESKD: End-stage kidney disease; HDL: High-density lipoprotein; DN: diabetic nephropathy; DPN: diabetic peripheral neuropathy; PDR: Proliferative diabetic nephropathy. Time: Time between last clinical visit and death  
mod: moderate; sev: severe; mvl: micro-vascular lesions; Amyloid plaques: +++ frequent; ++ moderate; + infrequent; NA- not assessed.  
Pt.17- family history of Alzheimer's; Pt 24<high school diploma; High school only – Pt 1,5,18; No HTN – 7,13,22,25; frequent hypoglycemia – Pt.7; BMI>30 – Pt. 6,18; BMI>25: 8,10, 13,16, 19, 21,23; All patients LDL <160; Cholesterol: High (>240) in Pt. 1; borderline high (>200)- Pt 4,5; rest all had normal cholesterol at last visit.; Triglycerides: High (>200) – Pt.1; borderline high (150-199) – Pt.6, 21; rest all had normal triglycerides at last visit

**Supplementary Table 8: Longitudinal study (n=48) - associations between cognitive decline and visual acuity**

| Cognitive function        | Average cognitive decline over follow-up | Association of cognitive change over follow-up with visual acuity at first cognitive visit |                 |
|---------------------------|------------------------------------------|--------------------------------------------------------------------------------------------|-----------------|
|                           |                                          | Est (SE)                                                                                   | P               |
|                           | <b>Mean (SD)</b>                         |                                                                                            |                 |
| <b>Psychomotor (D)</b>    | -4.81 (40.4)                             | 12.67 (16.6)                                                                               | 0.45            |
| <b>Psychomotor (ND)</b>   | -19.83 (100.6)                           | -217.15 (38.5)                                                                             | <b>1.50E-06</b> |
| <b>Working memory</b>     | 0.19 (3.3)                               | -2.14 (1.5)                                                                                | 0.17            |
| <b>Delayed recall</b>     | -4.35 (17.8)                             | -6.03 (8.8)                                                                                | 0.5             |
| <b>Immediate recall</b>   | -1.98 (10.1)                             | -2.19 (5.1)                                                                                | 0.67            |
| <b>Executive function</b> | 0.54 (3.0)                               | 1.9 (1.4)                                                                                  | 0.19            |

**Supplementary Table 9. Brain MRI Protocol as per the Alzheimer's disease Neuroimaging Initiative (ADNI)-3 advanced imaging protocol**

| Sequence Name                               | Approx. MRI time (min) | Outcomes                                                                                                                                                                                                               |
|---------------------------------------------|------------------------|------------------------------------------------------------------------------------------------------------------------------------------------------------------------------------------------------------------------|
| <b>MP-RAGE</b>                              | 6:20                   | T1-weighted structure analysis including volumetric measures of whole brain and regional structures (hippocampus and entorhinal cortex), cortical thickness and atrophy. Analysis by FreeSurfer v.6 neuroimaging tool. |
| <b>3D FLAIR</b>                             | 5:30                   | White matter disease, infarction, pathology, multi-spectral tissue segmentation                                                                                                                                        |
| <b>High Res Hippo</b>                       | 4:20                   | Hippocampal subfield measurement                                                                                                                                                                                       |
| <b>T2* GRE (T2*-weighted gradient echo)</b> | 4:10                   | Cerebral microbleed assessment                                                                                                                                                                                         |
| <b>ASL</b>                                  | 4:00                   | Grey matter and white matter fluid maps, Cerebral blood flow                                                                                                                                                           |
| <b>Diffusion Tensor Imaging (DTI)</b>       | 7:10                   | Fractional anisotropy, apparent diffusion coefficient, mean diffusivity of white matter tracts. Analysis by DTIStudio, ROIEditor, and Diffeomap.                                                                       |
| <b>EPI-BOLD</b>                             | 10:00                  | Resting state fMRI analysis                                                                                                                                                                                            |

**Supplementary Table 10. Brain MRI volumes - description of Regions of Interest (ROIs)**

| <b>ROI</b>                         | <b>Description</b>                                                                                                                                                                    |
|------------------------------------|---------------------------------------------------------------------------------------------------------------------------------------------------------------------------------------|
| Total brain                        | Volume of total brain excluding ventricles                                                                                                                                            |
| Total gray matter                  | Volume of all gray matter                                                                                                                                                             |
| Total white matter                 | Volume of total gray matter subtracted from total brain volumes excluding ventricles                                                                                                  |
| Frontal lobe                       | Superior Frontal, Rostral and Caudal Middle Frontal, Pars Opercularis, Pars Triangularis, and Pars Orbitalis; Lateral and Medial Orbitofrontal; Precentral; Paracentral; Frontal Pole |
| Parietal lobe                      | Superior Parietal; Inferior Parietal; Supramarginal; Postcentral; Precuneus                                                                                                           |
| Occipital lobe                     | Lateral Occipital; Lingual; Cuneus; Pericalcarine                                                                                                                                     |
| Temporal lobe                      | Superior, Middle, and Inferior Temporal; Banks of the Superior Temporal Sulcus; Fusiform; Transverse Temporal; Entorhinal; Temporal Pole; Parahippocampal                             |
| Hippocampal                        |                                                                                                                                                                                       |
| Alzheimer disease signature region | hippocampus + parahippocampal + entorhinal + inferior parietal lobule + precuneus + cuneus                                                                                            |
| Deep gray matter                   | thalamus + putamen + caudate + globus pallidus                                                                                                                                        |

# Supplementary Fig.1. White matter hyperintensities (WMH) in T1D Medalists

## A. WMH associations with cognitive function in T1D

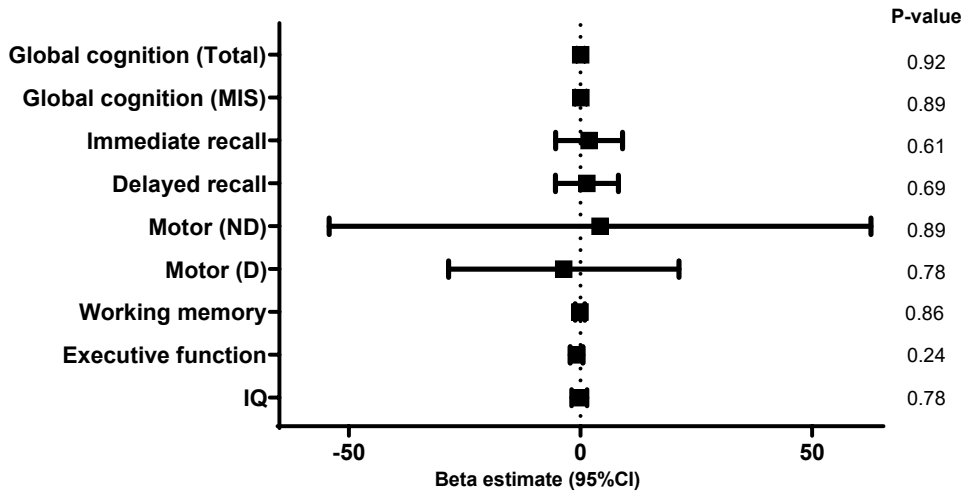

## B. WMH associations with AGEs & kidney function in T1D

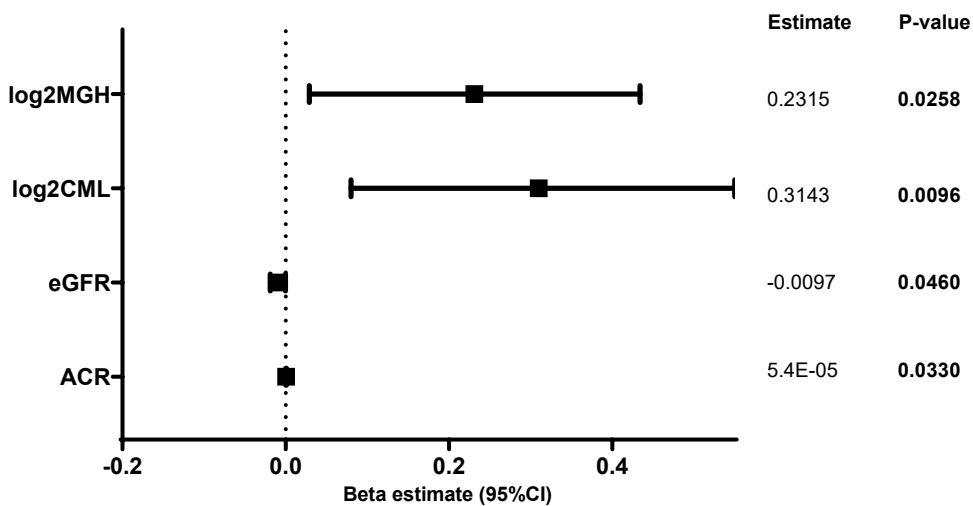

## C. WMH associations with subclinical atherosclerosis in T1D

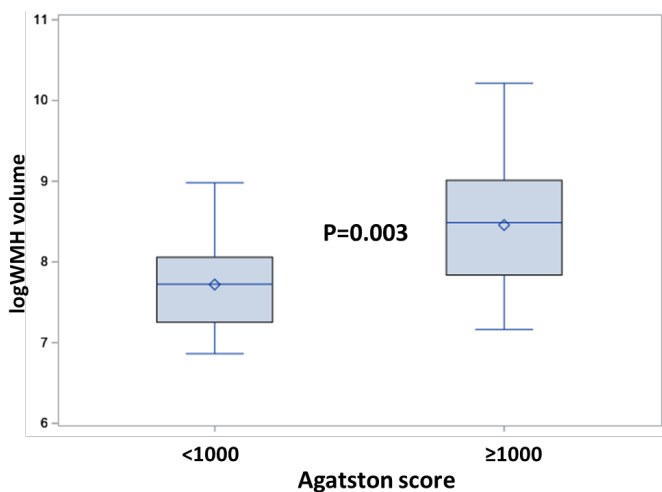

# Supplementary Fig.2A-C. Cerebral Perfusion (ASL)

**A.**

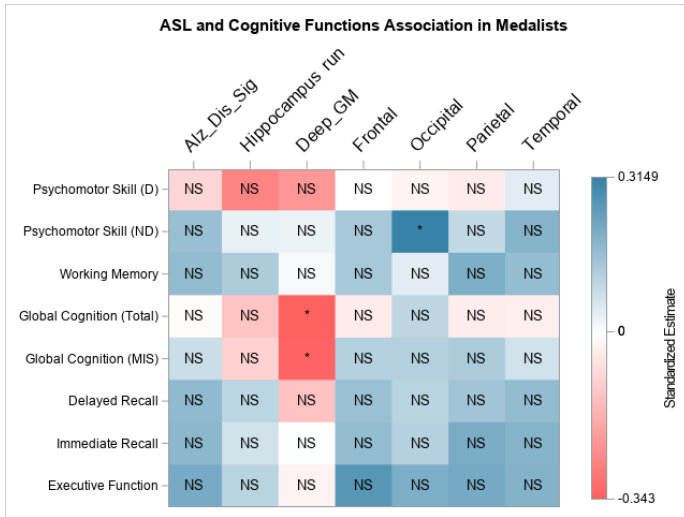

**B.**

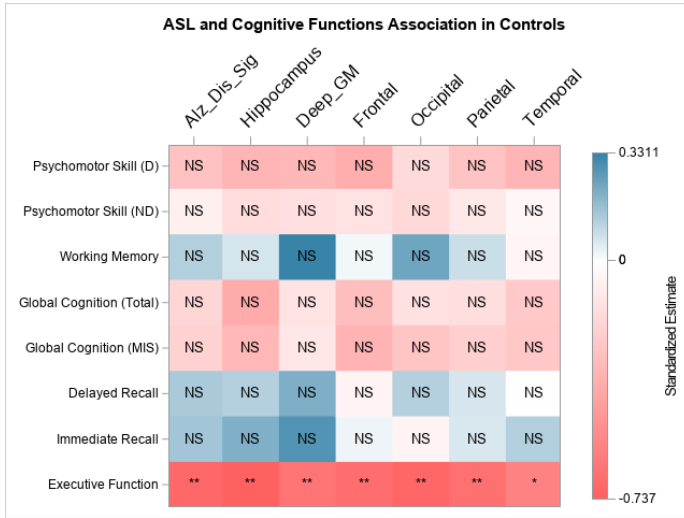

**C. ASL And Clinical Characteristics In T1D Medalists**

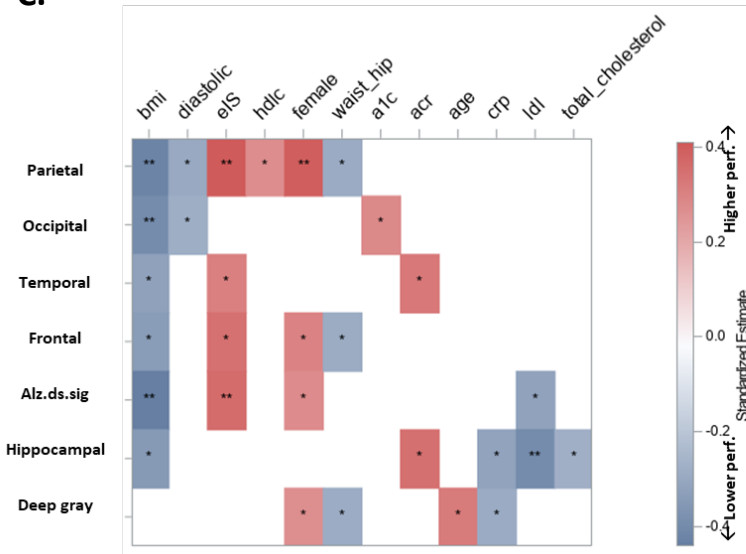

Remain p<0.05 in Multivariable models

- BMI, sex
- BMI
- ACR
- None
- BMI, sex, LDL
- ACR, LDL
- Sex, Age, CRP

\*\*\*p<0.0001  
\*\*p<0.01  
\*p<0.05

# Supplementary Fig.3. Thickness of retinal layers (OCT-derived) and brain volumes

**A.**

Total retinal thickness and brain volumes

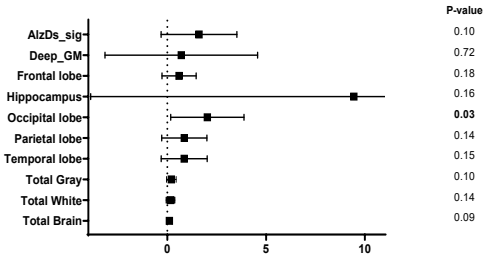

**B.**

Inner retinal thickness and brain volumes

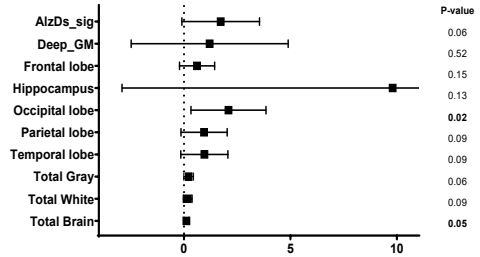

**C.**

Outer retinal thickness and brain volumes

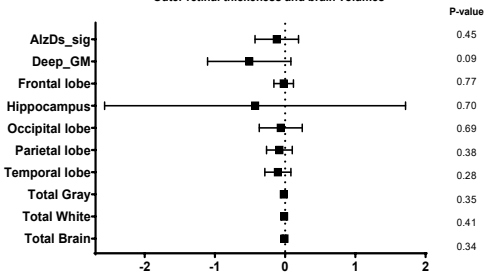

**D.**

RNFL and brain volumes

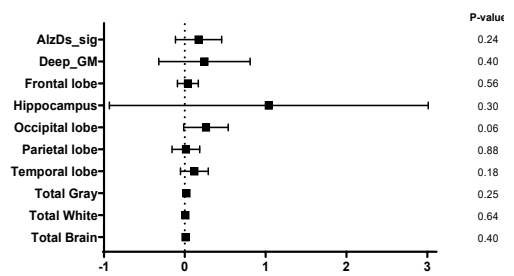

**E.**

Ganglion cell layer (GCL) and brain volumes

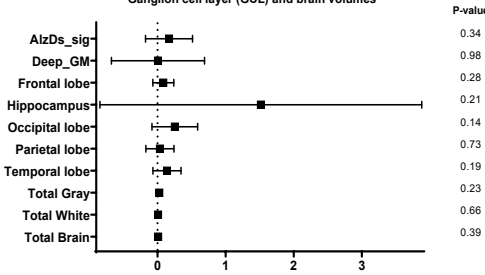

**F.**

Retinal pigment epithelium (RPE) and brain volumes

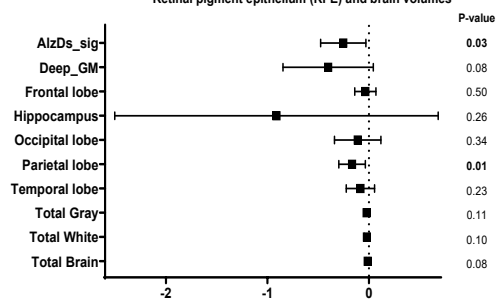

**G.**

Inner plexiform layer (IPL) and brain volumes

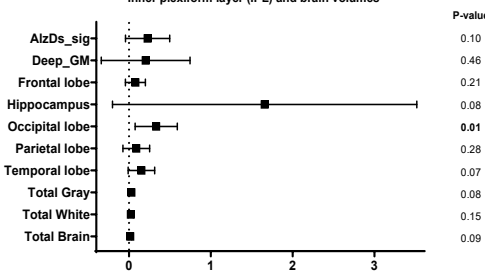

**H.**

Outer plexiform layer (OPL) and brain volumes

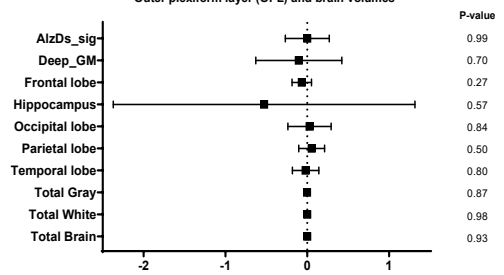

**I.**

Inner nuclear layer (INL) and brain volumes

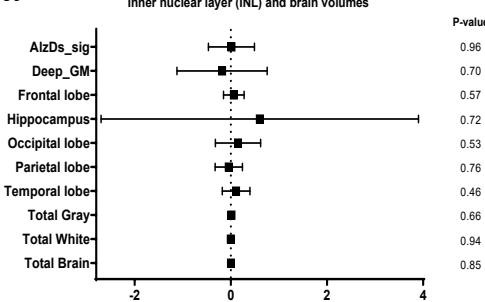

## Supplementary Fig.4: Study design flowchart

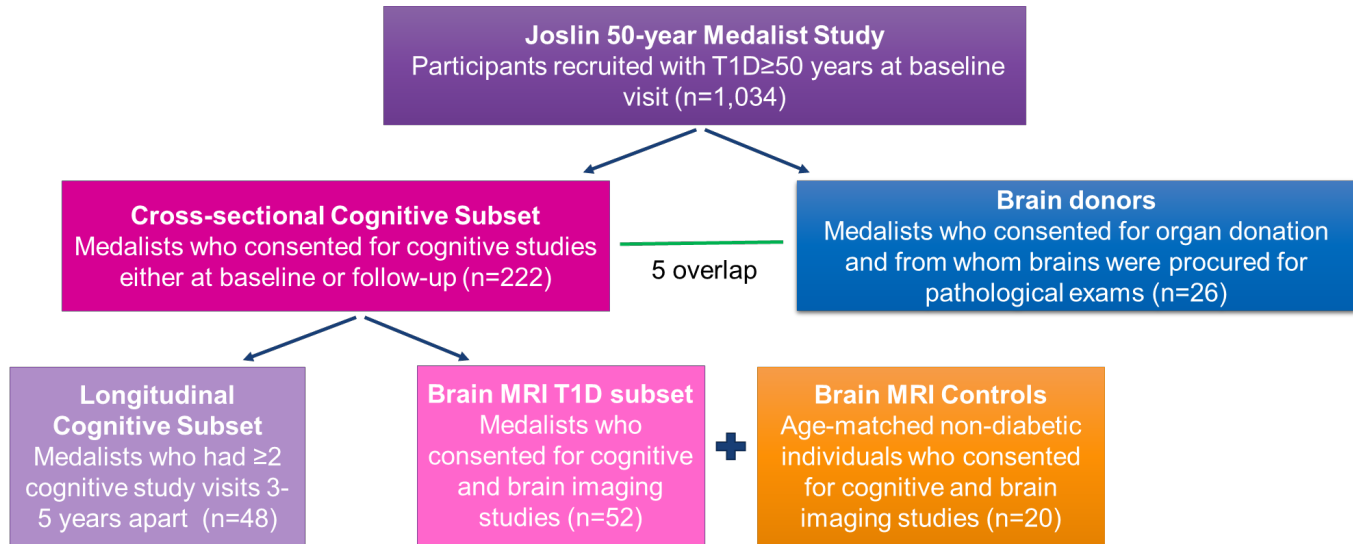

Supplement: sd1 [file 1]
